# Supplementary material
Source: PubMed Central journal article supplement (PMC4860551)
Supplement: PulmCirc-006-082.s001.pdf [file PulmCirc-006-082.s001.pdf]

## Appendix from Johansen et al., “The serotonin transporter promotes a pathological estrogen metabolic pathway in pulmonary hypertension via cytochrome P450 1B1”

(Pulm. Circ., vol. 6, no. 1, p. 82)

### Supplementary figures

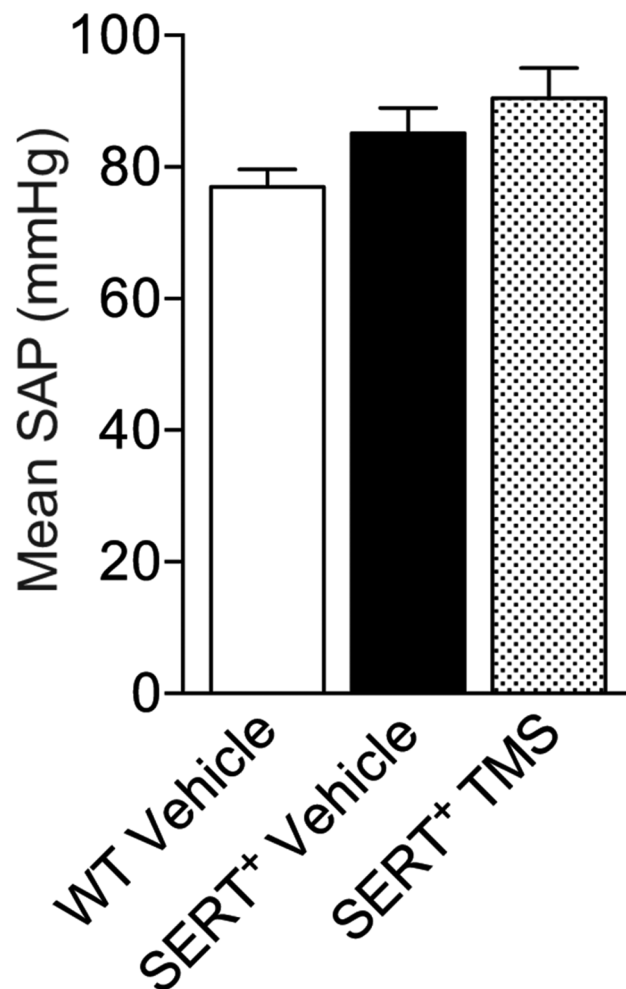

Figure S1. Inhibition of cytochrome P450 1B1 (CYP1B1) with 2,3',4,5'-tetramethoxystilbene (TMS) has no effects on mean systemic arterial pressures (SAPs). Female SERT<sup>+</sup> mice were injected with 1.5 mg/kg TMS intraperitoneally for 2 weeks and compared with wild-type (WT; C57Bl/6J CBA) and SERT<sup>+</sup> vehicle-treated mice. Mean SAPs were measured by cannulation of the carotid artery;  $n = 7-10$ . Data were analyzed by a 1-way analysis of variance followed by a Tukey post hoc test. SERT<sup>+</sup>: serotonin transporter is overexpressed.

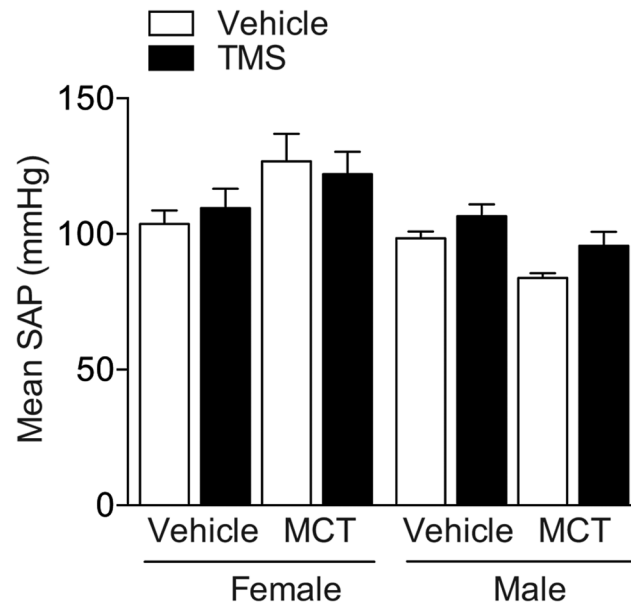

Figure S2. Inhibition of cytochrome P450 1B1 (CYP1B1) with 2,3', 4,5'-tetramethoxystilbene (TMS) and monocrotaline (MCT) has no effects on mean systemic arterial pressures (SAPs). Female and male rats were given a single dose of MCT (60 mg/kg subcutaneously) and 14 days later were given TMS (3 mg/kg/day intraperitoneally) or vehicle (~5% ethanol in saline) for an additional 14 days. Mean SAPs were measured by cannulation of the carotid artery;  $n = 5-11$ . Data were analyzed by a 1-way analysis of variance followed by a Tukey post hoc test.
